# Supplementary material
Source: MDPI journal article supplement (https://www.mdpi.com/2410-3888/8/8/409)
Supplement: s1 [file s1]

Table S2. Hydrolytic and antimicrobial activities of selected culturable bacterial strains isolated from *S. aurata*.

| Strain number | Isolation medium       | Hydrolytic activity |             |        |          |         |         |           | Antimicrobial activity |                                              |                               |
|---------------|------------------------|---------------------|-------------|--------|----------|---------|---------|-----------|------------------------|----------------------------------------------|-------------------------------|
|               |                        | Amylase             | Collagenase | Lipase | Protease | Phytase | Tannase | Cellulase | <i>V. anguillarum</i>  | <i>P. damsela</i><br><i>subsp. piscicida</i> | <i>T.</i><br><i>maritimum</i> |
| UMA117        | TSAs                   | +                   | +           | +      | +        | -       | +       | -         | -                      | -                                            | -                             |
| UMA121        | TSAs                   | +                   | +           | +      | +        | -       | -       | +         | -                      | -                                            | -                             |
| UMA126        | TSAs                   | -                   | +           | +      | +        | +       | -       | +         | -                      | -                                            | +                             |
| UMA129        | TSAs                   | +                   | +           | +      | +        | -       | -       | +         | -                      | -                                            | +                             |
| UMA131        | TSAs                   | -                   | +           | +      | +        | +       | -       | +         | -                      | +                                            | +                             |
| UMA137        | TSAs                   | -                   | +           | -      | +        | -       | -       | -         | +                      | +                                            | +                             |
| UMA140        | TSAs                   | -                   | +           | -      | +        | +       | -       | +         | +                      | +                                            | +                             |
| UMA142        | TSAs                   | -                   | +           | -      | +        | +       | -       | -         | +                      | +                                            | +                             |
| UMA143        | TSAs                   | +                   | +           | +      | +        | +       | -       | -         | +                      | +                                            | +                             |
| UMA146        | TSAs                   | +                   | +           | +      | +        | -       | -       | +         | -                      | -                                            | -                             |
| UMA147        | TSAs                   | +                   | +           | +      | +        | -       | -       | +         | -                      | -                                            | +                             |
| UMA151        | TSAs                   | +                   | +           | +      | +        | +       | -       | -         | -                      | -                                            | -                             |
| UMA152        | TSAs                   | +                   | +           | +      | +        | +       | -       | +         | -                      | -                                            | -                             |
| UMA153        | TSAs                   | -                   | -           | -      | -        | +       | -       | -         | -                      | -                                            | -                             |
| UMA157        | TSAs                   | +                   | +           | -      | +        | +       | -       | +         | -                      | -                                            | -                             |
| UMA158        | TSAs                   | -                   | +           | +      | -        | +       | -       | +         | -                      | +                                            | -                             |
| UMA166        | TSAs<br>(Spore-former) | -                   | +           | -      | +        | -       | -       | -         | +                      | +                                            | +                             |
| UMA169        | TSAs                   | -                   | +           | +      | +        | +       | -       | -         | +                      | +                                            | +                             |
| UMA186        | TSAs                   | +                   | +           | -      | +        | -       | +       | +         | -                      | -                                            | -                             |
| UMA191        | (Spore-former)         | +                   | +           | -      | +        | +       | +       | -         | -                      | -                                            | -                             |

| Strain number | Isolation medium | Hydrolytic activity |             |        |          |         |         |           | Antimicrobial activity |                                              |                               |
|---------------|------------------|---------------------|-------------|--------|----------|---------|---------|-----------|------------------------|----------------------------------------------|-------------------------------|
|               |                  | Amylase             | Collagenase | Lipase | Protease | Phytase | Tannase | Cellulase | <i>V. anguillarum</i>  | <i>P. damsela</i><br><i>subsp. piscicida</i> | <i>T.</i><br><i>maritimum</i> |
| UMA195        | TSA <sub>s</sub> | +                   | +           | -      | +        | +       | -       | +         | -                      | -                                            | -                             |
| UMA210        | MMA              | +                   | +           | -      | +        | +       | -       | +         | -                      | -                                            | -                             |
| UMA211        | MMA              | +                   | +           | +      | +        | -       | -       | +         | -                      | -                                            | -                             |
| UMA212        | MMA              | +                   | +           | +      | +        | +       | -       | +         | -                      | -                                            | -                             |
| UMA213        | MMA              | -                   | +           | +      | +        | +       | -       | +         | +                      | +                                            | +                             |
| UMA215        | MMA              | +                   | +           | +      | +        | +       | -       | -         | -                      | +                                            | +                             |
| UMA216        | MMA              | -                   | +           | -      | +        | +       | -       | +         | +                      | +                                            | +                             |
| UMA217        | MMA              | -                   | +           | -      | +        | +       | -       | -         | +                      | +                                            | +                             |
| UMA218        | MMA              | -                   | +           | -      | +        | +       | -       | -         | +                      | +                                            | +                             |
| UMA222        | MRS              | -                   | +           | -      | -        | +       | -       | +         | +                      | +                                            | +                             |
| UMA223        | MRS              | -                   | +           | -      | +        | +       | -       | -         | +                      | +                                            | +                             |
| UMA230        | MRS              | +                   | +           | +      | +        | +       | -       | +         | -                      | -                                            | +                             |
