# Supplementary material
Source: MDPI journal article supplement (https://www.mdpi.com/2410-3888/8/8/409)
Supplement: s1 [file s1]

Table S1. Hydrolytic activity of culturable bacterial strains isolated from *S. aurata*.

| Strain number | Isolation medium | Amylase | Collagenase | Lipase | Protease | Phytase | Tannase | Cellulase |
|---------------|------------------|---------|-------------|--------|----------|---------|---------|-----------|
| UMA117        | TSAs             | +       | +           | +      | +        | -       | +       | -         |
| UMA118        | TSAs             | -       | +           | -      | +        | +       | -       | +         |
| UMA119        | TSAs             | -       | +           | -      | -        | +       | -       | +         |
| UMA120        | TSAs             | -       | -           | -      | -        | +       | +       | +         |
| UMA121        | TSAs             | +       | +           | +      | +        | -       | -       | +         |
| UMA122        | TSAs             | -       | -           | -      | -        | +       | +       | +         |
| UMA123        | TSAs             | -       | +           | -      | +        | -       | -       | +         |
| UMA124        | TSAs             | -       | -           | -      | -        | -       | -       | +         |
| UMA125        | TSAs             | -       | -           | +      | -        | -       | -       | +         |
| UMA126        | TSAs             | -       | +           | +      | +        | +       | -       | +         |
| UMA127        | TSAs             | -       | +           | -      | -        | -       | -       | +         |
| UMA128        | TSAs             | -       | +           | +      | +        | -       | -       | -         |
| UMA129        | TSAs             | +       | +           | +      | +        | -       | -       | +         |
| UMA130        | TSAs             | -       | +           | +      | +        | -       | -       | -         |
| UMA131        | TSAs             | -       | +           | +      | +        | +       | -       | +         |
| UMA132        | TSAs             | +       | +           | -      | -        | +       | -       | +         |
| UMA133        | TSAs             | -       | -           | +      | -        | -       | -       | -         |
| UMA134        | TSAs             | -       | +           | +      | -        | -       | -       | +         |
| UMA135        | TSAs             | +       | +           | -      | +        | -       | -       | -         |
| UMA136        | TSAs             | -       | +           | -      | +        | -       | -       | +         |
| UMA137        | TSAs             | -       | +           | -      | +        | -       | -       | -         |
| UMA138        | TSAs             | -       | +           | -      | -        | -       | -       | +         |
| UMA139        | TSAs             | -       | -           | -      | -        | -       | -       | +         |
| UMA140        | TSAs             | -       | +           | -      | +        | +       | -       | +         |
| UMA141        | TSAs             | -       | +           | -      | -        | -       | +       | +         |
| UMA142        | TSAs             | -       | +           | -      | +        | +       | -       | -         |
| UMA143        | TSAs             | +       | +           | +      | +        | +       | -       | -         |
| UMA144        | TSAs             | -       | -           | +      | -        | +       | +       | +         |
| UMA145        | TSAs             | -       | +           | +      | +        | -       | -       | -         |
| UMA146        | TSAs             | +       | +           | +      | +        | -       | -       | +         |
| UMA147        | TSAs             | +       | +           | +      | +        | -       | -       | +         |
| UMA148        | TSAs             | +       | +           | -      | +        | -       | -       | +         |
| UMA149        | TSAs             | +       | +           | -      | +        | -       | -       | +         |
| UMA150        | TSAs             | -       | +           | +      | -        | +       | -       | +         |

| Strain number | Isolation medium        | Amylase | Collagenase | Lipase | Protease | Phytase | Tannase | Cellulase |
|---------------|-------------------------|---------|-------------|--------|----------|---------|---------|-----------|
| UMA151        | TSAs                    | +       | +           | +      | +        | +       | -       | -         |
| UMA152        | TSAs                    | +       | +           | +      | +        | +       | -       | +         |
| UMA153        | TSAs                    | -       | -           | -      | -        | +       | -       | -         |
| UMA154        | TSAs                    | -       | +           | -      | +        | +       | -       | -         |
| UMA155        | TSAs                    | +       | +           | -      | +        | -       | -       | +         |
| UMA156        | TSAs                    | +       | +           | -      | +        | -       | -       | -         |
| UMA157        | TSAs                    | +       | +           | -      | +        | +       | -       | +         |
| UMA158        | TSAs                    | -       | +           | +      | -        | +       | -       | +         |
| UMA159        | TSAs                    | -       | +           | +      | -        | +       | -       | -         |
| UMA160        | TSAs                    | -       | +           | -      | -        | -       | -       | -         |
| UMA161        | TSAs                    | +       | +           | -      | +        | -       | -       | -         |
| UMA162        | TSAs                    | -       | +           | -      | -        | -       | -       | +         |
| UMA163        | TSAs                    | -       | -           | -      | -        | -       | -       | +         |
| UMA164        | TSAs<br>(spore-formers) | -       | +           | +      | -        | +       | -       | +         |
| UMA165        | TSAs<br>(spore-formers) | -       | -           | +      | -        | -       | -       | +         |
| UMA166        | TSAs<br>(spore-formers) | -       | +           | -      | +        | -       | -       | -         |
| UMA167        | TSAs<br>(spore-formers) | -       | +           | -      | -        | -       | -       | -         |
| UMA168        | TSAs                    | -       | -           | -      | -        | +       | -       | +         |
| UMA169        | TSAs                    | -       | +           | +      | +        | +       | -       | -         |
| UMA170        | TSAs<br>(spore-formers) | -       | -           | -      | -        | -       | -       | +         |
| UMA171        | TSAs<br>(spore-formers) | -       | -           | -      | -        | -       | -       | +         |
| UMA172        | TSAs                    | -       | +           | +      | -        | -       | -       | +         |
| UMA173        | TSAs<br>(spore-formers) | +       | +           | -      | +        | -       | -       | +         |
| UMA174        | TSAs<br>(spore-formers) | +       | +           | -      | +        | -       | -       | +         |
| UMA175        | TSAs<br>(spore-formers) | -       | -           | +      | -        | -       | -       | +         |
| UMA176        | TSAs<br>(spore-formers) | -       | +           | +      | -        | -       | -       | +         |
| UMA177        | TSAs<br>(spore-formers) | +       | +           | -      | +        | -       | -       | +         |
| UMA178        | TSAs<br>(spore-formers) | +       | +           | -      | -        | +       | -       | -         |
| UMA179        | TSAs<br>(spore-formers) | +       | +           | -      | +        | -       | -       | -         |
| UMA180        | TSAs<br>(spore-formers) | +       | +           | -      | +        | -       | -       | +         |
| UMA181        | TSAs<br>(spore-formers) | -       | +           | +      | -        | -       | -       | +         |

| Strain number | Isolation medium        | Amylase | Collagenase | Lipase | Protease | Phytase | Tannase | Cellulase |
|---------------|-------------------------|---------|-------------|--------|----------|---------|---------|-----------|
| UMA182        | TSAs<br>(spore-formers) | +       | +           | -      | +        | -       | -       | +         |
| UMA183        | TSAs<br>(spore-formers) | +       | -           | -      | +        | -       | -       | +         |
| UMA184        | TSAs<br>(spore-formers) | +       | -           | +      | -        | -       | -       | +         |
| UMA185        | TSAs<br>(spore-formers) | -       | -           | -      | -        | -       | -       | -         |
| UMA186        | TSAs<br>(spore-formers) | +       | +           | -      | +        | -       | +       | +         |
| UMA187        | TSAs<br>(spore-formers) | -       | +           | +      | -        | +       | -       | +         |
| UMA188        | TSAs<br>(spore-formers) | -       | +           | +      | -        | -       | -       | -         |
| UMA189        | TSAs<br>(spore-formers) | -       | +           | -      | +        | -       | -       | -         |
| UMA190        | TSAs<br>(spore-formers) | -       | -           | +      | -        | -       | -       | -         |
| UMA191        | TSAs<br>(spore-formers) | +       | +           | -      | +        | +       | +       | -         |
| UMA192        | TSAs<br>(spore-formers) | -       | +           | -      | -        | -       | -       | -         |
| UMA193        | TSAs<br>(spore-formers) | -       | +           | -      | -        | +       | -       | -         |
| UMA194        | TSAs<br>(spore-formers) | -       | +           | -      | -        | +       | -       | -         |
| UMA195        | TSAs<br>(spore-formers) | +       | +           | -      | +        | +       | -       | +         |
| UMA196        | MMA                     | -       | +           | -      | -        | +       | -       | +         |
| UMA197        | MMA                     | -       | +           | -      | -        | +       | -       | -         |
| UMA198        | MMA                     | -       | -           | +      | -        | +       | +       | -         |
| UMA199        | MMA                     | -       | +           | -      | -        | +       | -       | -         |
| UMA200        | MMA                     | -       | +           | -      | +        | -       | -       | -         |
| UMA201        | MMA                     | -       | +           | +      | -        | +       | -       | -         |
| UMA202        | MMA                     | -       | +           | +      | -        | +       | -       | -         |
| UMA203        | MMA                     | -       | -           | +      | -        | +       | -       | -         |
| UMA204        | MMA                     | -       | +           | -      | +        | +       | -       | -         |
| UMA205        | MMA                     | -       | +           | -      | -        | -       | -       | +         |
| UMA206        | MMA                     | -       | +           | -      | -        | +       | -       | -         |
| UMA207        | MMA                     | -       | +           | -      | -        | +       | -       | +         |
| UMA208        | MMA                     | -       | -           | -      | -        | +       | -       | +         |
| UMA209        | MMA                     | +       | -           | +      | -        | -       | +       | -         |
| UMA210        | MMA                     | +       | +           | -      | +        | +       | -       | +         |
| UMA211        | MMA                     | +       | +           | +      | +        | -       | -       | +         |
| UMA212        | MMA                     | +       | +           | +      | +        | +       | -       | +         |

| Strain<br>number | Isolation<br>medium     | Amylase | Collagenase | Lipase | Protease | Phytase | Tannase | Cellulase |
|------------------|-------------------------|---------|-------------|--------|----------|---------|---------|-----------|
| UMA213           | MMA                     | -       | +           | +      | +        | +       | -       | +         |
| UMA214           | MMA                     | +       | +           | +      | +        | -       | -       | -         |
| UMA215           | MMA                     | +       | +           | +      | +        | +       | -       | -         |
| UMA216           | MMA                     | -       | +           | -      | +        | +       | -       | +         |
| UMA217           | MMA                     | -       | +           | -      | +        | +       | -       | -         |
| UMA218           | MMA                     | -       | +           | -      | +        | +       | -       | -         |
| UMA219           | MMA                     | -       | -           | +      | -        | -       | -       | -         |
| UMA220           | TSAs<br>(spore-formers) | -       | +           | +      | -        | +       | -       | -         |
| UMA221           | MMA                     | -       | +           | -      | +        | +       | -       | +         |
| UMA222           | MRS                     | -       | +           | -      | -        | +       | -       | +         |
| UMA223           | MRS                     | -       | +           | -      | +        | +       | -       | -         |
| UMA224           | MRS                     | -       | -           | -      | -        | -       | -       | -         |
| UMA225           | MRS                     | -       | +           | +      | +        | -       | -       | +         |
| UMA226           | MRS                     | -       | -           | -      | -        | -       | -       | -         |
| UMA227           | MRS                     | -       | -           | +      | -        | -       | -       | +         |
| UMA228           | MRS                     | -       | +           | +      | -        | -       | -       | +         |
| UMA229           | MRS                     | -       | -           | -      | -        | +       | -       | -         |
| UMA230           | MRS                     | +       | +           | +      | +        | +       | -       | +         |
| UMA231           | MRS                     | -       | +           | -      | +        | +       | -       | -         |
| UMA232           | MRS                     | -       | +           | -      | -        | +       | -       | +         |
| UMA233           | MMA                     | -       | +           | +      | -        | -       | -       | -         |
